# Supplementary material
Source: PubMed Central journal article supplement (PMC2922598)
Supplement: 1002467107_pnas.201002467SI.pdf [file 1002467107_pnas.201002467SI.pdf]

# Supporting Information

Li et al. 10.1073/pnas.1002467107

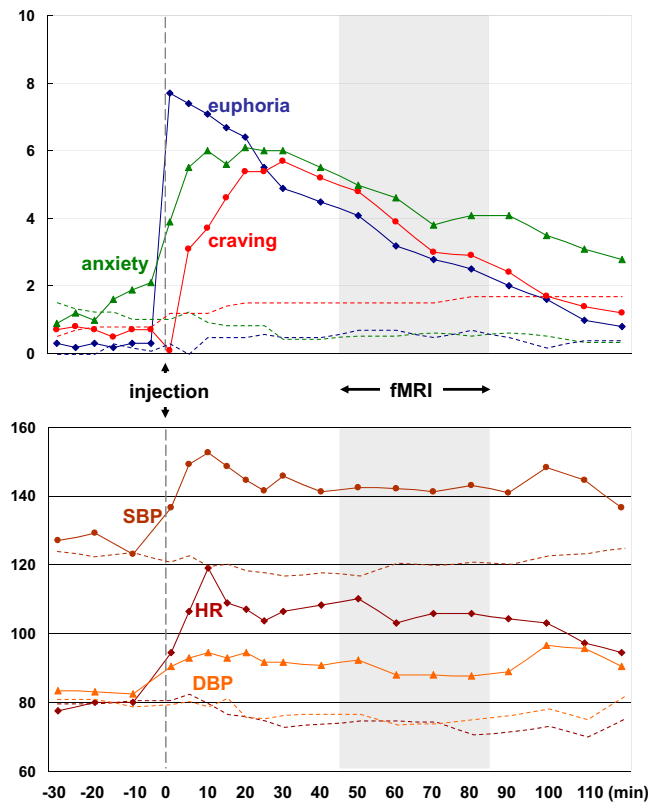

**Fig. S1.** Psychological assessments (*Upper*) and cardiovascular measures (*Lower*) during methylphenidate (solid line), as compared with saline placebo (dashed line) administration. The vertical dashed line represents time (zero) of injection. As compared with placebo, methylphenidate evoked significant changes in euphoria, craving, and anxiety, as well as increases in blood pressure and heart rate. The shaded areas represent the time period of fMRI. The change in these psychological and cardiovascular measures was computed for the first 30 min after i.v. injection and for the period of fMRI by subtracting the average baseline measure (30 min before injection) from the average measure of each of the two periods.

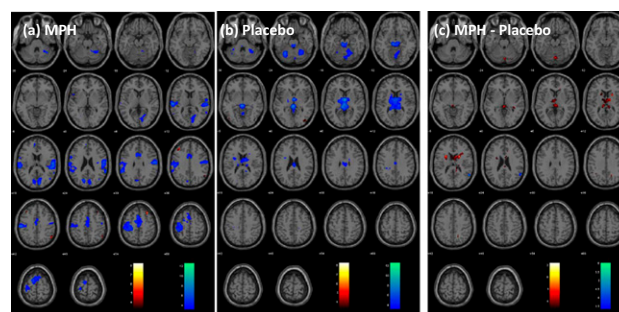

**Fig. S2.** Regional brain activations during SS versus SE trials, for (A) methylphenidate (MPH), (B) Placebo sessions; and (C) a contrast between MPH and placebo. BOLD contrasts were overlaid on a structural images in axial sections, from  $z = -30$  to  $z = 72$ . Adjacent sections are 6 mm apart. Color bars represent voxel T value. Warm color: SS > SE and winter: SE > SS, for (A) and (B); For (C), Warm color: MPH > placebo (SS - SE) and winter: MPH < placebo (SS - SE).  $P < 0.005$ , uncorrected, for all contrasts.

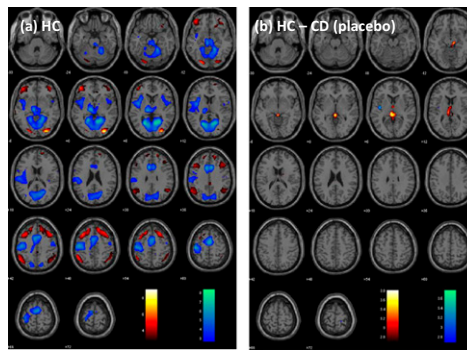

**Fig. S3.** Regional brain activations during SS versus SE trials, for (A) 36 healthy control (HC) participants; warm color: SS > SE; winter color: SE > SS; and (B) comparing HC and the 10 cocaine-dependent volunteers (CD) during the P session; Warm color: HC > CD (SS - SE); winter color: CD > HC (SS - SE). BOLD contrasts were overlaid on a structural image in axial sections, from  $z = -30$  to  $z = 72$ . Adjacent sections are 6 mm apart. Color bars represent voxel T value.  $P < 0.005$ , uncorrected, for all contrasts.

**Table S1. Regional brain activation: SS vs. SE**

| Cluster size,<br>voxels    | Voxel<br>Z value | MNI coordinate, mm |     |     | Side | Identified brain region            |
|----------------------------|------------------|--------------------|-----|-----|------|------------------------------------|
|                            |                  | x                  | y   | z   |      |                                    |
| <b>MPH, SS &gt; SE</b>     |                  |                    |     |     |      |                                    |
| 24                         | 4.30             | 30                 | 26  | 55  | R    | Middle frontal gyrus               |
| 37                         | 4.15             | 54                 | -61 | 43  | R    | Inferior parietal lobule           |
| 22                         | 3.90             | -36                | 35  | 37  | L    | Middle frontal gyrus               |
| <b>MPH, SE &gt; SS</b>     |                  |                    |     |     |      |                                    |
| 568                        | 4.89             | 57                 | -16 | 19  | R    | Superior temporal gyrus            |
| 344                        | 4.64             | -12                | -73 | 22  | L    | Cuneus                             |
|                            | 4.14             | 12                 | -85 | 19  | R    | Cuneus                             |
| 1076                       | 4.59             | -60                | -22 | 10  | L    | Superior/transverse temporal gyrus |
|                            | 4.25             | -57                | -22 | 43  | L    | Superior temporal gyrus            |
|                            | 4.12             | -54                | -43 | 31  | L    | Precentral cortex                  |
| 92                         | 4.15             | 36                 | -49 | -26 | R    | Cerebellar cortex                  |
| 661                        | 4.11             | -12                | 2   | 67  | R/L  | Supplementary motor area           |
|                            | 3.95             | -3                 | 14  | 55  | R/L  | Presupplementary motor area        |
| 18                         | 3.61             | -6                 | 50  | 22  | R/L  | Anterior cingulate cortex          |
| 41                         | 3.19             | -60                | 5   | 25  | L    | Superior temporal gyrus            |
| <b>Placebo, SS &gt; SE</b> |                  |                    |     |     |      |                                    |
| 31                         | 3.27             | 39                 | -82 | 1   | R    | Middle/transverse occipital gyrus  |
| 16                         | 3.22             | -48                | -76 | -8  | L    | Middle/transverse occipital gyrus  |
| <b>Placebo, SE &gt; SS</b> |                  |                    |     |     |      |                                    |
| 1582                       | 5.02             | 3                  | -7  | 1   | R/L  | Thalamus/epithalamus               |
|                            | 4.43             | 0                  | -31 | -2  | R/L  | Thalamus/epithalamus               |
|                            | 4.32             | -9                 | -34 | 7   | R/L  | Thalamus/epithalamus               |
| 112                        | 3.99             | -30                | -64 | -26 | L    | Cerebellar cortex                  |
| 95                         | 3.70             | 3                  | -22 | 25  | R/L  | Corpus callosum                    |
| 40                         | 3.16             | 6                  | -34 | -44 | R/L  | Midbrain/tectum/pretectal region   |

$P < 0.005$ , uncorrected, and 15 voxels in extent of activation; MPH, M session.

**Table S2. Regional brain activations: methylphenidate (MPH) > placebo for SS > SE**

| Cluster size, voxels                | Voxel Z value | MNI coordinate, mm |     |     | Side | Identified brain region              |
|-------------------------------------|---------------|--------------------|-----|-----|------|--------------------------------------|
|                                     |               | x                  | y   | z   |      |                                      |
| <b>MPH &gt; placebo, SS &gt; SE</b> |               |                    |     |     |      |                                      |
| 453                                 | 3.91          | 24                 | 8   | 16  | R/L  | Thalamus/epithalamus/caudate/putamen |
|                                     | 3.85          | -24                | 8   | 19  | R/L  | Thalamus/epithalamus/caudate/putamen |
|                                     | 3.77          | 9                  | 8   | 22  | R/L  | Thalamus/epithalamus/caudate/putamen |
| 40                                  | 3.45          | 3                  | -76 | -20 | R/L  | Cerebellar cortex                    |
| 15                                  | 3.25          | 39                 | -73 | -26 | R    | Cerebellar cortex                    |
| <b>MPH &lt; Placebo, SS &gt; SE</b> |               |                    |     |     |      |                                      |
| 30                                  | 3.60          | 57                 | -58 | 19  | R    | Superior temporal sulcus             |

*P* < 0.005, uncorrected, and 15 voxels in extent of activation.

**Table S3. Linear correlation of striatothalamic activation with changes in SSRT as well as psychological and cardiovascular measures**

|     | Euphoria | Craving | Anxiety | HR     | SBP    | DBP    | SSRT   |
|-----|----------|---------|---------|--------|--------|--------|--------|
| L   | 0.9471   | 0.4569  | 0.4144  | 0.3080 | 0.4317 | 0.5227 | 0.6626 |
| R   | 0.3446   | 0.1034  | 0.4734  | 0.4211 | 0.5343 | 0.8857 | 0.8627 |
| L+R | 0.5878   | 0.2021  | 0.4044  | 0.3211 | 0.4453 | 0.7936 | 0.7421 |

Note: *P* values are of Pearson correlation between the change in the psychological /cardiovascular measure or SSRT: MPH (fMRI baseline) – placebo (fMRI baseline) and difference in regional brain activation: MPH (SS – SE) – placebo (SS – SE). L, left striatothalamic cluster; R, right striatothalamic cluster; L+R, combined; HR, heart rate; DBP, diastolic blood pressure.

**Table S4. Regional brain activations of SS vs. SE: healthy control subjects (n = 36)**

| Cluster size, voxels | Voxel Z value | MNI coordinate, mm |     |     | Side | Identified brain region                                   |
|----------------------|---------------|--------------------|-----|-----|------|-----------------------------------------------------------|
|                      |               | x                  | y   | z   |      |                                                           |
| <b>SS &gt; SE</b>    |               |                    |     |     |      |                                                           |
| 225                  | 6.46          | 33                 | -88 | -2  | R    | Occipital cortex                                          |
| 172                  | 5.40          | -24                | -88 | -11 | L    | Occipital cortex                                          |
| 400                  | 5.18          | -51                | -52 | 52  | L    | Inferior parietal lobule                                  |
| 345                  | 4.98          | -42                | 50  | 1   | L    | Orbitofrontal cortex                                      |
| 535                  | 4.91          | -36                | 20  | 46  | L    | Middle frontal cortex                                     |
| 672                  | 4.84          | 45                 | 17  | 46  | R    | Middle frontal cortex                                     |
| 220                  | 4.12          | 45                 | 44  | -5  | R    | Inferior frontal cortex                                   |
| 378                  | 4.08          | 42                 | -61 | 52  | R    | Inferior parietal lobule                                  |
| 26                   | 3.37          | 3                  | -37 | 37  | R/L  | Middle/posterior cingulate cortex                         |
| 30                   | 3.31          | -66                | -28 | -8  | L    | Cerebellar cortex                                         |
| <b>SE &gt; SS</b>    |               |                    |     |     |      |                                                           |
| 3917                 | 6.16          | -21                | -64 | 10  | R/L  | Lingual G/thalamus/epithalamus/cerebellar cortex/midbrain |
|                      | 5.99          | 18                 | -61 | 10  | R/L  | Lingual G/thalamus/epithalamus/cerebellar cortex/midbrain |
|                      | 5.86          | 9                  | -58 | 4   | R/L  | Lingual G/thalamus/epithalamus/cerebellar cortex/midbrain |
| 3068                 | 5.57          | -9                 | 14  | 31  | R/L  | Anterior cingulate cortex/supplementary motor area        |
|                      | 5.35          | 0                  | -4  | 64  | R/L  | Anterior cingulate cortex/supplementary motor area        |
|                      | 5.33          | 9                  | 17  | 37  | R/L  | Anterior cingulate cortex/supplementary motor area        |
| 184                  | 3.88          | -54                | -4  | 43  | L    | Precentral cortex/superior temporal cortex/insula         |
| 99                   | 3.72          | 45                 | 5   | 7   | R    | Insula                                                    |

*P* < 0.005, uncorrected, and 15 voxels in extent of activation; G, gyrus.

**Table S5. Regional brain activations: HC versus CD (placebo) for SS > SE**

| Cluster size (voxels)  | Voxel<br>Z value | MNI coordinate (mm) |     |     | Side | Identified brain region    |
|------------------------|------------------|---------------------|-----|-----|------|----------------------------|
|                        |                  | x                   | y   | z   |      |                            |
| <b>HC &gt; Placebo</b> |                  |                     |     |     |      |                            |
| 260                    | 3.52             | -6                  | -28 | 7   | R/L  | Thalamus/epithalamus       |
|                        | 3.52             | 0                   | -34 | 1   | R/L  | Epithalamus/colliculi      |
|                        | 3.52             | 9                   | -25 | -14 | R/L  | Colliculi/pretectal region |
| <b>Placebo &gt; HC</b> |                  |                     |     |     |      |                            |
| 27                     | 3.49             | -39                 | -10 | 7   | L    | Posterior insula           |

*P* < 0.005, uncorrected, and 15 voxels in extent of activation; HC, healthy controls; CD, cocaine-dependent volunteers; G, gyrus.

**Table S6. Linear correlation of MFC and vmPFC activation with psychological and cardiovascular measures**

|       | Euphoria          | Craving           | Anxiety           | HR                | SBP               | DBP               |
|-------|-------------------|-------------------|-------------------|-------------------|-------------------|-------------------|
| MFC   | <i>P</i> < 0.1688 | <i>P</i> < 0.5875 | <i>P</i> < 0.8380 | <i>P</i> < 0.9063 | <i>P</i> < 0.0805 | <i>P</i> < 0.7669 |
| vmPFC | <i>P</i> < 0.3257 | <i>P</i> < 0.6412 | <i>P</i> < 0.2284 | <i>P</i> < 0.8956 | <i>P</i> < 0.0017 | <i>P</i> < 0.1270 |

*P* values are of Pearson correlation between the change in the psychological or cardiovascular measure: methylphenidate (fMRI baseline) – placebo (fMRI baseline) and difference in regional brain activation: methylphenidate (SS – SE) – placebo (SS – SE). HR, heart rate; DBP, diastolic blood pressure.
